# Supplementary material for: Identifying Adolescents at Risk for Emotional Disorders with Latent Profile Analysis: A Personalized, Transdiagnostic Preventive Intervention
Source: Springer Nature journal article supplement (doi:10.1007/s10578-024-01689-z), 2024-04-12

PROFILES OF ADOLESCENTS AT RISK FOR EMOTIONAL DISORDER

|           | 1      | 2      | 3      | 4      | 5      | 6      | 7      | 8      | 9      | 10     | 11     | 12     | 13     | 14     | 15     | 16     | 17     | 18     | 19     | 20     | 21     | 22     | 23     | 24    | 25   |
|-----------|--------|--------|--------|--------|--------|--------|--------|--------|--------|--------|--------|--------|--------|--------|--------|--------|--------|--------|--------|--------|--------|--------|--------|-------|------|
| 18        | -.47** | .25**  | .20**  | .27**  | .31**  | .06*   | .04    | .06*   | .13**  | .12**  | .23**  | .27**  | .19**  | .38**  | .38**  | .59**  | .49**  | 1      |        |        |        |        |        |       |      |
| 19        | -.30** | .03    | .28**  | .17**  | .29**  | .01    | -.04   | .01    | .02    | .08**  | .17**  | .18**  | .13**  | .24**  | .20**  | .47**  | .25**  | .41**  | 1      |        |        |        |        |       |      |
| 20        | -.42** | .33**  | .17**  | .21**  | .37**  | .11**  | .08**  | .09**  | .17**  | .14**  | .22**  | .25**  | .22**  | .35**  | .33**  | .41**  | .40**  | .46**  | .37**  | 1      |        |        |        |       |      |
| 21        | -.47** | .37**  | .23**  | .25**  | .26**  | .11**  | .12**  | .14**  | .18**  | .18**  | .27**  | .28**  | .24**  | .33**  | .33**  | .50**  | .55**  | .52**  | .37**  | .66**  | 1      |        |        |       |      |
| 22        | -.33** | .28**  | .25**  | .20**  | -.01   | .17**  | .16**  | .14**  | .15**  | .12**  | .11**  | .14**  | .26**  | .20**  | .23**  | .30**  | .23**  | .19**  | .17**  | .26**  | .32**  | 1      |        |       |      |
| 23        | -.35** | .23**  | .19**  | .17**  | .05    | .13**  | .13**  | .17**  | .16**  | .12**  | .14**  | .16**  | .22**  | .20**  | .23**  | .32**  | .27**  | .23**  | .20**  | .29**  | .38**  | .53**  | 1      |       |      |
| 24        | .25**  | -.05*  | -.07** | -.06*  | .14**  | -.04   | -.04   | -.02   | -.14** | -.04   | -.04   | -.07** | -.14** | -.07** | -.10** | -.16** | -.05   | -.03   | -.02   | -.08** | -.10** | -.33** | -.21** | 1     |      |
| 25        | .64**  | -.31** | -.28** | -.31** | -.17** | -.18** | -.16** | -.19** | -.19** | -.19** | -.32** | -.39** | -.34** | -.48** | -.54** | -.66** | -.51** | -.48** | -.29** | -.48** | -.53** | -.34   | -.37** | .25** | 1    |
| <i>M</i>  | 2.38   | 0.29   | 0.12   | 19.40% | 0.97   | 5.60%  | 4.40%  | 5.90%  | 45.20% | 26%    | 25.50% | 43.20% | 1.81   | 48.80% | 34.04% | 1.12   | 0.54   | 1.49   | 0.59   | 1.39   | 0.83   | 0.45   | 0.96   | 1.59  | 3.34 |
| <i>SD</i> | 7.71   | 0.48   | 0.23   | —      | 0.81   | —      | —      | —      | —      | —      | —      | —      | 0.65   | —      | —      | 0.77   | 0.61   | 0.83   | 0.59   | 0.79   | 0.71   | 0.38   | 0.50   | 0.36  | 0.77 |

*Note.* 1 = Resilience; 2 = Bullying; 3 = Cyberbullying; 4 = Social rejection; 5 = Fear of COVID-19; 6 = Alcohol use-related problem; 7 = Cannabis use-related problem; 8 = Tobacco use-related problem; 9 = Internet use-related problem; 10 = Difficulties falling asleep; 11 = Problems waking up at night; 12 = Unrefreshing sleep; 13 = Family Expressed Emotion; 14 = Concerns over physical appearance/weight; 15 = Physical appearance dissatisfaction; 16 = Depression; 17 = Panic; 18 = Social anxiety; 19 = Separation anxiety; 20 = Generalised anxiety; 21 = Obsessive-compulsive; 22 = Conduct problems; 23 = Hyperactivity/inattention; 24 = Prosocial behaviour; 25 = Quality of life; \*  $p < .05$ . \*\*  $p < .01$ .

## PROFILES OF ADOLESCENTS AT RISK FOR EMOTIONAL DISORDER

**Figure S11***Elbow plots for latent profile analysis*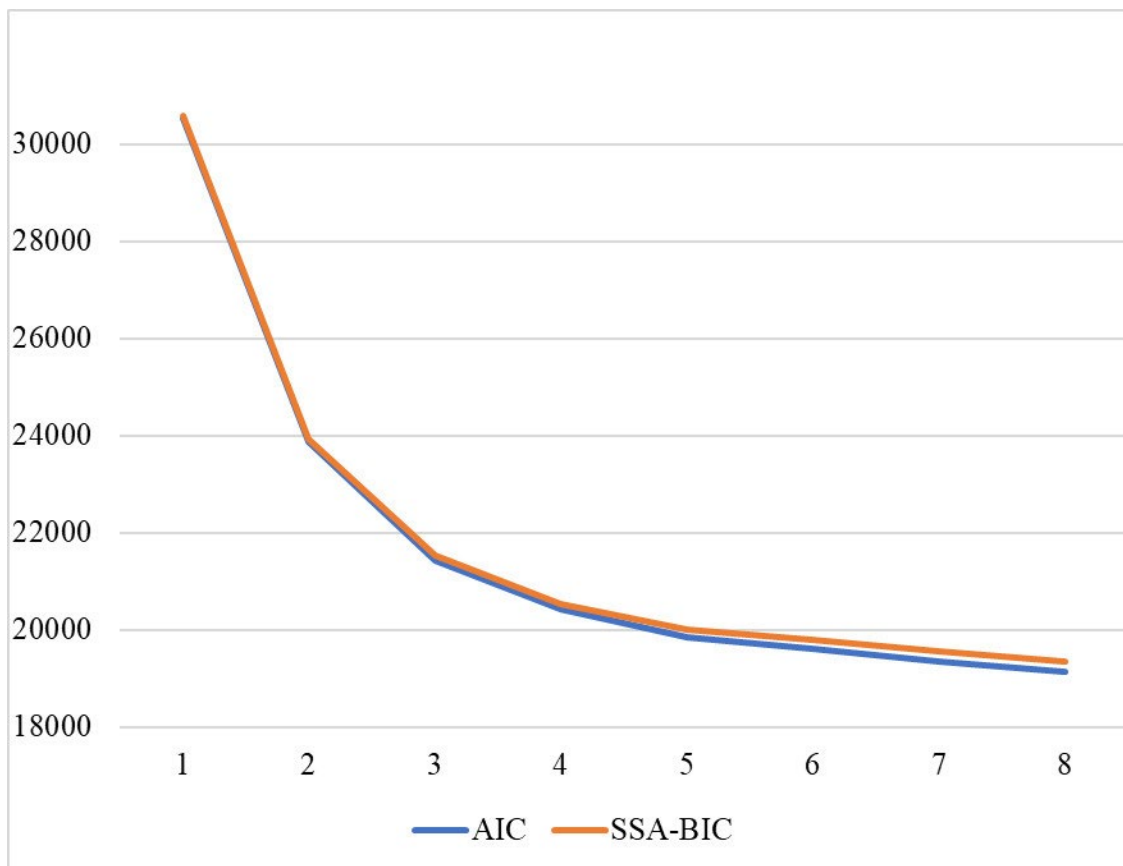

Supplement: MOESM1 [file 26968638]
